# Supplementary material for: Urate-lowering therapy for CKD patients with asymptomatic hyperuricemia without proteinuria elucidated by attribute-based research in the FEATHER Study
Source: PubMed Central journal article supplement (PMC8904814; doi:10.1038/s41598-022-07737-9), 2022-03-08
Supplement: 41598_2022_7737_MOESM1_ESM.pdf [file 41598_2022_7737_MOESM1_ESM.pdf]

## **Supporting information to “Urate-lowering Therapy for Patients with Asymptomatic Hyperuricemia without Proteinuria Elucidated by Attribute-Based Research in the FEATHER Study”**

This supplementary information provides further methodological detail and results for the main paper.

### **Supporting information**

S1 Figure. Flow chart of patient selection.

S2 Figure. Time-course changes in the estimated glomerular filtration rates (eGFRs) from week 0 through week 108 of treatment in the study population.

S1 Table. Baseline characteristics of the study participants receiving febuxostat stratified by the presence or absence of proteinuria.

S2 Table. Baseline characteristics of the study participants receiving febuxostat cross-classified by the presence or absence of proteinuria and serum creatinine level.

S1 Figure. Flow chart of patient selection.

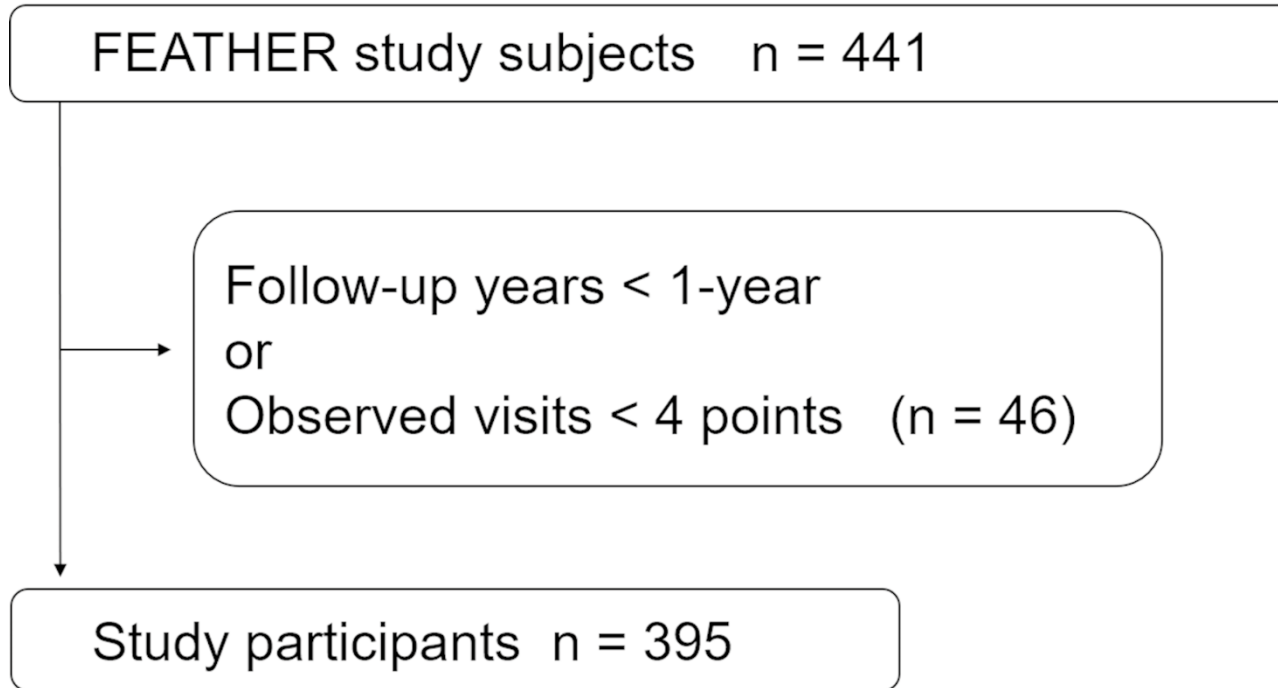

**S2 Figure. Time-course changes in the estimated glomerular filtration rates (eGFRs) from weeks 0 through 108 of treatment in the study population.**

The mean eGFR level in the two groups are shown at different timepoints during the trial. Error bars indicate standard error. The mean eGFR values are shown for participants with available levels at each timepoint. *P*-values were obtained by a test of trend profile using a mixed model.

**Entire Cohort**

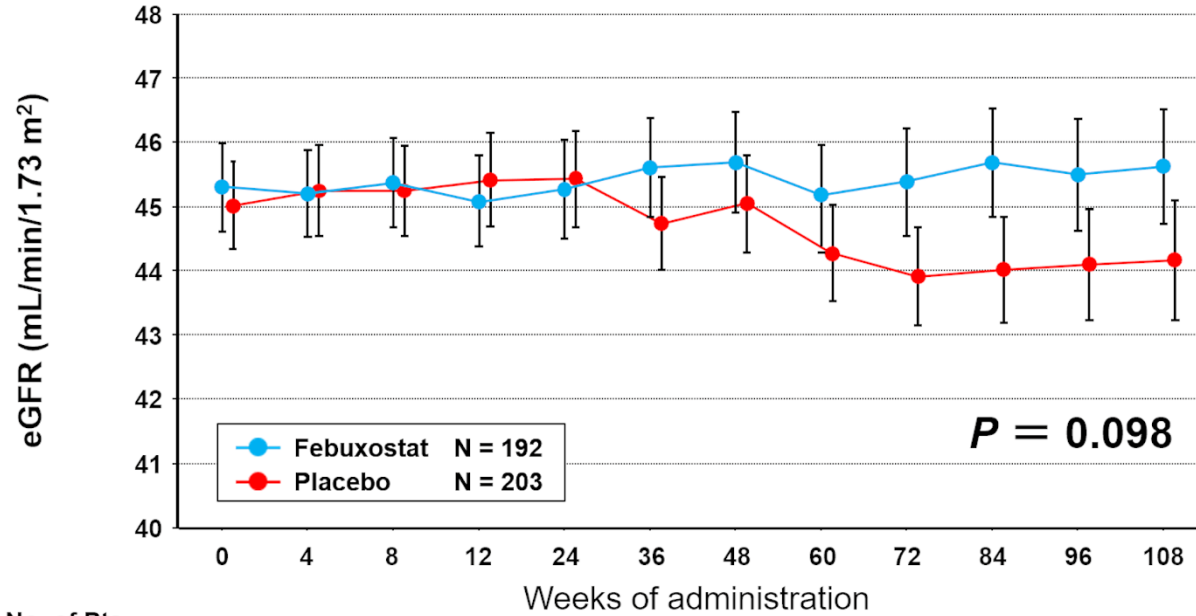

***P* = 0.098**

| No. of Pts | 0   | 4   | 8   | 12  | 24  | 36  | 48  | 60  | 72  | 84  | 96  | 108 |
|------------|-----|-----|-----|-----|-----|-----|-----|-----|-----|-----|-----|-----|
| Febuxostat | 192 | 192 | 192 | 192 | 192 | 192 | 190 | 190 | 186 | 183 | 182 | 179 |
| Placebo    | 203 | 203 | 203 | 203 | 203 | 203 | 203 | 200 | 195 | 191 | 188 | 186 |

**S1 Table. Baseline characteristics of the study participants receiving febuxostat stratified by the presence or absence of proteinuria.**

|                                           | Proteinuria-Negative (n = 218) |                      |                 | Proteinuria-Positive (n = 177) |                      |                 |
|-------------------------------------------|--------------------------------|----------------------|-----------------|--------------------------------|----------------------|-----------------|
|                                           | Placebo (n = 110)              | Febuxostat (n = 108) | <i>P</i> -value | Placebo (n = 93)               | Febuxostat (n = 84)  | <i>P</i> -value |
| <b>Clinical Characteristics</b>           |                                |                      |                 |                                |                      |                 |
| Male sex                                  | 89 (80.9%)                     | 89 (82.4%)           | 0.775           | 65 (69.9%)                     | 62 (73.8%)           | 0.563           |
| Age, years                                | 66.6 ± 11.3                    | 66.1 ± 10.2          | 0.739           | 62.4 ± 12.9                    | 62.8 ± 12.8          | 0.854           |
| Body mass index, kg/m <sup>2</sup>        | 24.4 ± 3.6                     | 25.1 ± 4.4           | 0.196           | 25.0 ± 3.7                     | 24.5 ± 4.7           | 0.490           |
| Systolic blood pressure, mmHg             | 129.5 ± 15.5                   | 130.8 ± 14.8         | 0.540           | 129.7 ± 14.5                   | 132.8 ± 15.3         | 0.164           |
| Diastolic blood pressure, mmHg            | 77.0 ± 11.4                    | 77.4 ± 9.6           | 0.795           | 77.7 ± 10.8                    | 79.8 ± 11.7          | 0.217           |
| Current or former smoker                  | 60 (54.5%)                     | 67 (62.0%)           | 0.524           | 57 (61.3%)                     | 53 (63.1%)           | 0.948           |
| <b>Laboratory Results</b>                 |                                |                      |                 |                                |                      |                 |
| Estimated GFR, mL/min/1.73 m <sup>2</sup> | 45.9 ± 10.1                    | 46.5 ± 9.1           | 0.670           | 44.0 ± 9.3                     | 43.8 ± 9.8           | 0.907           |
| Serum creatinine, mg/dL                   | 1.25 ± 0.23                    | 1.24 ± 0.23          | 0.604           | 1.27 ± 0.27                    | 1.30 ± 0.26          | 0.448           |
| Serum uric acid, mg/dL                    | 7.95 ± 0.63                    | 7.92 ± 0.60          | 0.730           | 8.02 ± 0.66                    | 7.97 ± 0.65          | 0.621           |
| Hemoglobin A1c, %                         | 6.0 ± 0.5                      | 6.0 ± 0.6            | 0.820           | 6.1 ± 0.7                      | 5.9 ± 0.5            | 0.139           |
| UACR, mg/g                                | 21.2 [7.1-76.7]                | 24.7 [7.2-87.6]      | 0.889           | 508.0 [210.0-973.0]            | 589.0 [253.0-1060.0] | 0.504           |
| <b>Coexisting conditions</b>              |                                |                      |                 |                                |                      |                 |
| Diabetes mellitus                         | 32 (29.1%)                     | 31 (28.7%)           | 0.950           | 27 (29.0%)                     | 24 (28.6%)           | 0.946           |
| Ischemic heart disease                    | 4 (3.6%)                       | 10 (9.3%)            | 0.090           | 7 (7.5%)                       | 3 (3.6%)             | 0.255           |
| Cerebrovascular disease                   | 11 (10.0%)                     | 14 (13.0%)           | 0.492           | 6 (6.5%)                       | 12 (14.3%)           | 0.085           |
| <b>Medications</b>                        |                                |                      |                 |                                |                      |                 |
| ACE inhibitor and/or ARB                  | 68 (61.8%)                     | 82 (75.9%)           | 0.025           | 84 (90.3%)                     | 76 (90.5%)           | 0.972           |
| Statins                                   | 30 (27.3%)                     | 40 (37.0%)           | 0.123           | 38 (40.9%)                     | 42 (50.0%)           | 0.222           |
| Antidiabetic drugs                        | 22 (20.0%)                     | 22 (20.4%)           | 0.946           | 23 (24.7%)                     | 14 (16.7%)           | 0.188           |
| Diuretics                                 | 13 (11.8%)                     | 27 (25.0%)           | 0.012           | 19 (20.4%)                     | 12 (14.3%)           | 0.283           |

*Note:* Values for categorical variables are given as count (percentage); values for continuous variables, as mean ± standard deviation; non-normally distributed data, as median [quartile 1-quartile 3].

Abbreviations: ACE, angiotensin-converting enzyme; ARB, angiotensin receptor blocker; CKD, chronic kidney disease; GFR, glomerular filtration rate; UACR, urinary albumin-creatinine ratio.

**S2 Table. Baseline characteristics of the study participants receiving febuxostat cross-classified by the presence or absence of proteinuria and serum creatinine level.**

|                                           | Proteinuria-Negative and s-Cre < Median (n = 107) |                     |                 | Proteinuria-Positive and s-Cre < Median (n = 85) |                     |                 |
|-------------------------------------------|---------------------------------------------------|---------------------|-----------------|--------------------------------------------------|---------------------|-----------------|
|                                           | Placebo (n = 52)                                  | Febuxostat (n = 55) | <i>P</i> -value | Placebo (n = 46)                                 | Febuxostat (n = 39) | <i>P</i> -value |
| <b>Clinical Characteristics</b>           |                                                   |                     |                 |                                                  |                     |                 |
| Male sex                                  | 35 (67.3%)                                        | 39 (70.9%)          | 0.687           | 25 (54.3%)                                       | 27 (69.2%)          | 0.161           |
| Age, years                                | 66.8 ± 11.4                                       | 64.4 ± 10.5         | 0.254           | 63.7 ± 12.5                                      | 63.5 ± 11.1         | 0.949           |
| Body mass index, kg/m <sup>2</sup>        | 24.5 ± 4.3                                        | 25.4 ± 4.9          | 0.296           | 25.2 ± 3.5                                       | 25.1 ± 4.7          | 0.940           |
| Systolic blood pressure, mmHg             | 131.2 ± 16.9                                      | 130.7 ± 14.6        | 0.874           | 126.7 ± 14.5                                     | 132.9 ± 14.6        | 0.052           |
| Diastolic blood pressure, mmHg            | 76.2 ± 11.7                                       | 77.3 ± 9.2          | 0.577           | 78.0 ± 10.9                                      | 79.1 ± 11.5         | 0.653           |
| Current or former smoker                  | 26 (50.0%)                                        | 33 (60.0%)          | 0.412           | 28 (60.9%)                                       | 22 (56.4%)          | 0.881           |
| <b>Laboratory Results</b>                 |                                                   |                     |                 |                                                  |                     |                 |
| Estimated GFR, mL/min/1.73 m <sup>2</sup> | 52.3 ± 8.9                                        | 52.3 ± 7.0          | 0.991           | 50.0 ± 8.0                                       | 51.4 ± 7.6          | 0.403           |
| Serum creatinine, mg/dL                   | 1.06 ± 0.10                                       | 1.06 ± 0.11         | 0.833           | 1.05 ± 0.11                                      | 1.07 ± 0.12         | 0.408           |
| Serum uric acid, mg/dL                    | 7.89 ± 0.61                                       | 7.88 ± 0.61         | 0.892           | 7.87 ± 0.65                                      | 7.94 ± 0.66         | 0.621           |
| Hemoglobin A1c, %                         | 6.0 ± 0.5                                         | 6.0 ± 0.6           | 0.791           | 6.0 ± 0.7                                        | 5.9 ± 0.4           | 0.645           |
| UACR, mg/g                                | 16.0 [6.8-68.3]                                   | 26.6 [8.7-89.4]     | 0.503           | 507.0 [229.0-973.0]                              | 479.0 [212.0-976.0] | 0.926           |
| <b>Coexisting conditions</b>              |                                                   |                     |                 |                                                  |                     |                 |
| Diabetes mellitus                         | 17 (32.7%)                                        | 18 (32.7%)          | 0.997           | 10 (21.7%)                                       | 10 (25.6%)          | 0.673           |
| Ischemic heart disease                    | 1 (1.9%)                                          | 6 (10.9%)           | 0.060           | 5 (10.9%)                                        | 0 (0.0)             | 0.034           |
| Cerebrovascular disease                   | 2 (3.8%)                                          | 2 (3.6%)            | 0.954           | 3 (6.5%)                                         | 7 (17.9%)           | 0.103           |
| <b>Medications</b>                        |                                                   |                     |                 |                                                  |                     |                 |
| ACE inhibitor and/or ARB                  | 25 (48.1%)                                        | 43 (78.2%)          | 0.001           | 43 (93.5%)                                       | 35 (89.7%)          | 0.533           |
| Statins                                   | 17 (32.7%)                                        | 19 (34.5%)          | 0.839           | 17 (37.0%)                                       | 19 (48.7%)          | 0.274           |
| Antidiabetic drugs                        | 12 (23.1%)                                        | 13 (23.6%)          | 0.946           | 7 (15.2%)                                        | 6 (15.4%)           | 0.983           |
| Diuretics                                 | 7 (13.5%)                                         | 32 (27.3%)          | 0.077           | 9 (19.6%)                                        | 5 (12.8%)           | 0.403           |

|                                           | Proteinuria-Negative and s-Cre $\geq$ Median (n = 111) |                     |         | Proteinuria-Positive and s-Cre $\geq$ Median (n = 92) |                      |         |
|-------------------------------------------|--------------------------------------------------------|---------------------|---------|-------------------------------------------------------|----------------------|---------|
|                                           | Placebo (n = 58)                                       | Febuxostat (n = 53) | P-value | Placebo (n = 47)                                      | Febuxostat (n = 45)  | P-value |
| <b>Clinical Characteristics</b>           |                                                        |                     |         |                                                       |                      |         |
| Male sex                                  | 54 (93.1%)                                             | 50 (94.3%)          | 0.789   | 40 (85.1%)                                            | 35 (77.8%)           | 0.365   |
| Age, years                                | 66.4 $\pm$ 11.3                                        | 67.9 $\pm$ 9.7      | 0.460   | 61.2 $\pm$ 13.2                                       | 62.2 $\pm$ 14.3      | 0.743   |
| Body mass index, kg/m <sup>2</sup>        | 24.4 $\pm$ 2.8                                         | 24.8 $\pm$ 3.8      | 0.482   | 24.7 $\pm$ 3.8                                        | 24.0 $\pm$ 4.6       | 0.412   |
| Systolic blood pressure, mmHg             | 128.0 $\pm$ 14.2                                       | 130.8 $\pm$ 15.1    | 0.311   | 132.6 $\pm$ 14.0                                      | 132.7 $\pm$ 15.9     | 0.977   |
| Diastolic blood pressure, mmHg            | 77.7 $\pm$ 11.1                                        | 77.4 $\pm$ 10.1     | 0.879   | 77.4 $\pm$ 10.8                                       | 80.4 $\pm$ 11.9      | 0.210   |
| Current or former smoker                  | 34 (58.6%)                                             | 34 (64.2%)          | 0.661   | 29 (61.7%)                                            | 31 (68.9%)           | 0.759   |
| <b>Laboratory Results</b>                 |                                                        |                     |         |                                                       |                      |         |
| Estimated GFR, mL/min/1.73 m <sup>2</sup> | 40.1 $\pm$ 7.1                                         | 40.4 $\pm$ 6.7      | 0.855   | 38.1 $\pm$ 6.3                                        | 37.2 $\pm$ 6.1       | 0.494   |
| Serum creatinine, mg/dL                   | 1.43 $\pm$ 0.17                                        | 1.42 $\pm$ 0.17     | 0.756   | 1.48 $\pm$ 0.20                                       | 1.49 $\pm$ 0.17      | 0.718   |
| Serum uric acid, mg/dL                    | 7.99 $\pm$ 0.65                                        | 7.96 $\pm$ 0.59     | 0.771   | 8.17 $\pm$ 0.64                                       | 8.00 $\pm$ 0.64      | 0.203   |
| Hemoglobin A1c, %                         | 6.0 $\pm$ 0.5                                          | 5.9 $\pm$ 0.5       | 0.546   | 6.2 $\pm$ 0.7                                         | 6.0 $\pm$ 0.6        | 0.119   |
| UACR, mg/g                                | 27.1 [8.4-102.0]                                       | 22.0 [6.8-85.7]     | 0.703   | 508.0 [181.0-1070.0]                                  | 616.0 [288.0-1100.0] | 0.262   |
| <b>Coexisting Conditions</b>              |                                                        |                     |         |                                                       |                      |         |
| Diabetes mellitus                         | 15 (25.9%)                                             | 13 (24.5%)          | 0.872   | 17 (36.2%)                                            | 14 (31.1%)           | 0.608   |
| Ischemic heart disease                    | 3 (5.2%)                                               | 4 (7.5%)            | 0.607   | 2 (4.3%)                                              | 3 (6.7%)             | 0.610   |
| Cerebrovascular disease                   | 9 (15.5%)                                              | 12 (22.6%)          | 0.338   | 3 (6.4%)                                              | 5 (11.1%)            | 0.421   |
| <b>Medications</b>                        |                                                        |                     |         |                                                       |                      |         |
| ACE inhibitor and/or ARB                  | 43 (74.1%)                                             | 39 (73.6%)          | 0.947   | 41 (87.2%)                                            | 41 (91.1%)           | 0.550   |
| Statins                                   | 13 (22.4%)                                             | 21 (39.6%)          | 0.049   | 21 (44.7%)                                            | 23 (51.1%)           | 0.537   |
| Antidiabetic drugs                        | 10 (17.2%)                                             | 9 (17.0%)           | 0.971   | 16 (34.0%)                                            | 8 (17.8%)            | 0.076   |
| Diuretics                                 | 6 (10.3%)                                              | 12 (22.6%)          | 0.079   | 10 (21.3%)                                            | 7 (15.6%)            | 0.480   |

Note: Values for categorical variables are given as count (percentage); values for continuous variables as mean  $\pm$  standard deviation; non-normally distributed data as median [quartile 1-quartile 3]. Abbreviations: s-Cre, serum creatinine; ACE, angiotensin-converting enzyme; ARB, angiotensin receptor blocker; CKD, chronic kidney disease; GFR, glomerular filtration rate; UACR, urinary albumin-to-creatinine ratio.
